# Supplementary material for: Repurposing the anti-malarial drug dihydroartemisinin suppresses metastasis of non-small-cell lung cancer via inhibiting NF-κB/GLUT1 axis
Source: PubMed Central journal article supplement (PMC5349987; doi:10.18632/oncotarget.13536), 2016-11-24
Supplement: oncotarget-07-87271-s001.pdf [file oncotarget-07-87271-s001.pdf]

# Repurposing the anti-malarial drug dihydroartemisinin suppresses metastasis of non-small-cell lung cancer via inhibiting NF- $\kappa$ B/GLUT1 axis

## SUPPLEMENTARY FIGURES

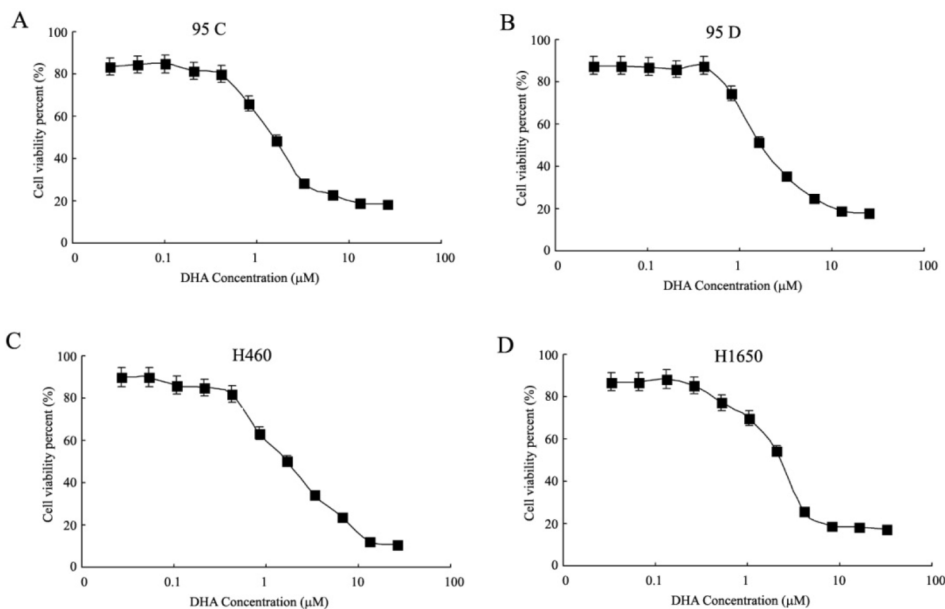

**Supplementary Figure S1: DHA inhibits NSCLC cell proliferation.** 95C, 95D, H460, and H1650 cells were treated with different concentration of DHA for 72 hours in DMEM containing 10% FBS. Cell survival was determined by MTT assays as described in Materials and Methods. Data are the mean  $\pm$  SD of at least three independent experiments performed in triplicate.

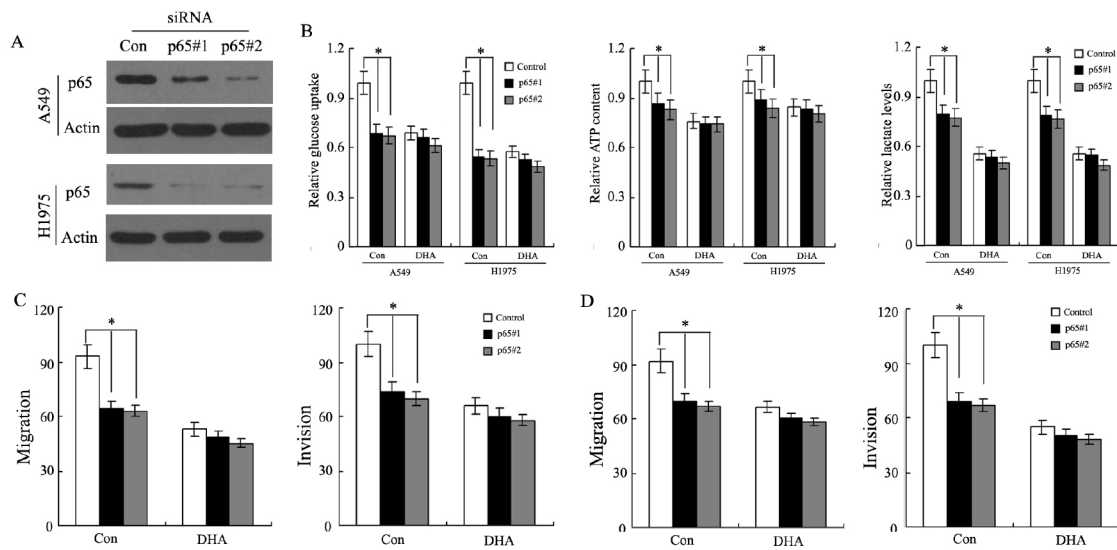

**Supplementary Figure S2: DHA represses the NSCLC migration and invasion via the NF- $\kappa$ B pathway in vitro. A.** Western-blot analysis of knockdown of p65 by siRNA in cells. **B.** DHA has no effect on glucose uptake, cell ATP content and lactate production in A549 and H1975 cells knockdown of p65. **C.** DHA has no effect on the invasion and migration abilities of NSCLC cells knockdown of p65. The indicated cells transfected with or without p65-siRNA (as indicated) for 24 hours were treated with or without DHA (15 $\mu$ M) for 24 hours, and then the migration and invasion assays (as indicated) were subsequently performed as described in Materials and Methods; n= 3; \*\*,  $P < 0.01$ . A two-tailed Student t test was used for statistical analysis.

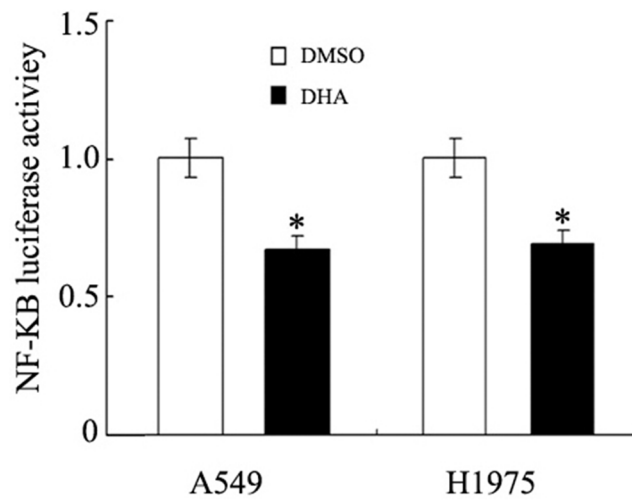

**Supplementary Figure S3: DHA inhibits the luciferase activity of NF-κB.** The indicated cells were transfected with a luciferase reporter for NF-κB, treated with or without DHA (15 μM) for 48 hours, and subjected to luciferase assays as described in Materials and Methods,  $P < 0.05$ . A two-tailed Student t test was used for statistical analysis.

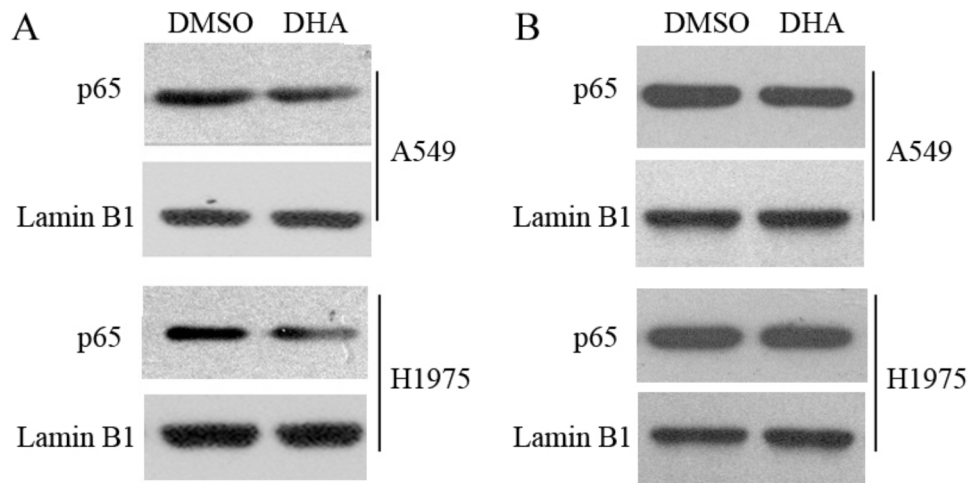

**Supplementary Figure S4: Upregulated mTOR activation increased p65 nuclear translocation inhibited by DHA.** A549 and H1975 cells were transfected with control A. and Rheb vector for 24h respectively, and then the indicated cells were treated with or without DHA (15  $\mu$ M) for 48 hours and then subjected to cell fractionation and analyzed by Western blotting.
